# Supplementary material for: Defective RNA of a Novel Mycovirus with High Transmissibility Detrimental to Biocontrol Properties of Trichoderma spp
Source: PubMed Central journal article supplement (PMC6920978; doi:10.3390/microorganisms7110507), 2019-10-29
Supplement: microorganisms-07-00507-s001.pdf [file microorganisms-07-00507-s001.pdf]

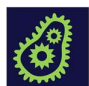

## Supplementary Materials

Table S1. Primers used in this study.

| Primer name                                              | Sequence (5'→3')         | Position <sup>1</sup>             |           | Polarity <sup>2</sup> |
|----------------------------------------------------------|--------------------------|-----------------------------------|-----------|-----------------------|
|                                                          |                          | ThHV1                             | ThHV1-S   |                       |
| cDNA cloning of ThHV1 and ThHV1-S                        |                          | ThHV1                             | ThHV1-S   |                       |
| G1F                                                      | TTAGCAAGAGCACCAAAT       | 5389–5406                         | 4143–4160 | +                     |
| G1R                                                      | CAATGAGCCAATAACAGG       | 6130–6147                         | 4884–4901 | –                     |
| G2F                                                      | AGCATTTAGCTTATCGGCATCA   | 7667–7688                         | 6421–6442 | +                     |
| G2R                                                      | TGGGCACAGTTCATTTGTAGAG   | 8324–8345                         | 7078–7099 | –                     |
| G3F                                                      | CGGTTTGCTGGAGATAG        | 8637–8653                         | 7391–7407 | +                     |
| G3R                                                      | ATACGAACACTGGGTAGAA      | 9875–9893                         | 8629–8647 | –                     |
| P1F                                                      | AGTCGTGCTGGTTCTAAAAT     | 5878–5897                         | 4632–4651 | +                     |
| P1R                                                      | GTCAC TGGGCTTTTCTCTAA    | 6374–6393                         | 5218–5147 | –                     |
| P5F                                                      | AAATGATTGTGAGGTCGTA      | 3633–3651                         | 2387–2405 | +                     |
| P5R                                                      | ATTCGGTCGGTTGTGA         | 5576–5591                         | 4330–4345 | –                     |
| P6F                                                      | AATTACCTGCGCTTGGGACA     | 5957–5976                         | 4711–4730 | +                     |
| P6R                                                      | GGAAGCATGGCCTGTTGTTG     | 7892–7911                         | 6646–6665 | –                     |
| P7F                                                      | CTGGAATCGCTAGCCGAGAA     | 707–726                           | 707–726   | +                     |
| P7R                                                      | ACTGCCATCAGACCACCTTG     | 3820–3829                         | 2574–2593 | –                     |
| 70-5SP                                                   | CCAACAGTCTGCCATTCCACC    | 2614–2634                         | 1368–1388 | –                     |
| 70-3SP                                                   | GGGGCTGTGCCACGAAA        | 10269–10285                       | 9023–9039 | +                     |
| 2012-5SP                                                 | GGGGGTTGCCCTAGTAAAGA     | 860–879                           | 860–879   | –                     |
| 2012-3SP                                                 | ATGAACTTTATGAAGACGGACTC  | 9641–9663                         | 8395–8417 | +                     |
| 110A (adapter)                                           | TATCTTATCGGCGTGTCCTCC    | to 5' and 3'-end of dsRNA         |           | +/-                   |
| RC110A (primer)                                          | GGGGGACACGCCGATAAGATA    | complementary to the adapter 110A |           | -/+                   |
| To detect the presence of ThHV1 and ThHV1-S              |                          | ThHV1                             | ThHV1-S   |                       |
| C1F                                                      | TTGTTGTTTTACCCGCCCT      | 979–998                           | 979–998   | +                     |
| C1R                                                      | GGCCTCATGTTCTGGTCGAA     | 2585–2604                         | 1339–1358 | –                     |
| C2F                                                      | GAACGAGGGGAAGGTGTCAG     | 1647–1666                         | /         | +                     |
| C2R                                                      | GCGCTTGACCATTAACCC       | 2107–2126                         | /         | –                     |
| C3F                                                      | GCCTCATTATCGAGTTTATG     | 10507–10526                       | 9261–9280 | +                     |
| C3R                                                      | CAGTATTCGCAGTGCTGTT      | 11094–11112                       | 9693–9711 | –                     |
| For semi-quantitative PCR detection of ThHV1 and ThHV1-S |                          |                                   |           |                       |
| TML-F                                                    | GGTATGACGGTGAAGTGT       | 1570–1587                         | /         | +                     |
| TML-R                                                    | ATCAAGAGGAGACCCAAT       | 1710–1727                         | /         | –                     |
| TMS-F                                                    | ACCAAACAGGGAAGGACG       | 1073–1090                         | 1073–1090 | +                     |
| TMS-R                                                    | CTTGTGGCATAACGAACC       | 2471–2488                         | 1225–1242 | –                     |
| TMLS-F                                                   | ACCGTAAGTTTATTCAGCA      | 8423–8441                         | 7174–7192 | +                     |
| TMLS-R                                                   | CTCAAAGTATCCCACCAG       | 8559–8576                         | 7310–7327 | –                     |
| Tubulin-F                                                | CCAAGCTCTTGCTCTGCCA      | /                                 | /         | +                     |
| Tubulin-R                                                | CAATCTCACGCATGATGGCT     | /                                 | /         | –                     |
| To test cDNA inserts in the pMD18-T vector               |                          |                                   |           |                       |
| M13F-47                                                  | CGCCAGGGTTTTCCCAGTCACGAC | pMD18-T vector                    |           |                       |
| M13R-48                                                  | AGCGGATAACAATTCACACAGGA  | pMD18-T vector                    |           |                       |

<sup>1</sup> Positions of oligonucleotides for primers or the adapter in the cDNA of ThHV1/T-70 and ThHV1-S/T-70D were labeled in Figure S1 of this paper. <sup>2</sup> Polarity refers to positive strand (+) and negative strand (–) of dsRNA.

**Table S2.** Sequence identities between ThHV1 and other hypoviruses.

| Family             | Genus                 | Virus                                       | Acronym            | Amino Acid Identities (%) |       |       |       |       | Accession NO. |
|--------------------|-----------------------|---------------------------------------------|--------------------|---------------------------|-------|-------|-------|-------|---------------|
|                    |                       |                                             |                    | ORF2 Full                 | UGT   | PPPDE | RdRp  | Hel   |               |
| <i>Hypoviridae</i> | <b>Betahypovirus</b>  | <b>Sclerotinia sclerotiorum hypovirus 1</b> | <b>SsHV1/SZ150</b> | 45.98                     | 53.10 | 68.18 | 76.17 | 58.40 | JF781304      |
|                    |                       | Phomopsis Longicolla hypovirus 1            | PIHV1/ME711        | 50.43                     | 58.69 | 67.29 | 75.00 | 59.22 | KF537784      |
|                    |                       | Cryphonectria hypovirus 3                   | CHV3/GH2           | 55.74                     | 57.55 | 66.97 | 73.83 | 60.39 | NP-051710.1   |
|                    |                       | Botrytis cinerea hypovirus 1                | BcHV1/HBTom-372    | 55.31                     | 54.90 | 64.42 | 74.61 | 59.06 | MG554632      |
|                    |                       | Cryphonectria hypovirus 4                   | CHV4/SR2           | 47.86                     | 55.88 | 67.59 | 71.48 | 59.51 | YP-138519.1   |
|                    |                       | Valsa ceratosperma hypovirus 1              | VcHV1/MVC86        | 54.71                     | 56.94 | 67.59 | 71.76 | 60.47 | KF537784      |
|                    | <b>Alphahypovirus</b> | Cryphonectria hypovirus 1                   | CHV1/EP713         | 8.22                      | -     | -     | 24.05 | 14.56 | NP041092.1    |
|                    |                       | Cryphonectria hypovirus 2                   | CHV2/NB58          | 9.04                      | -     | -     | 23.90 | 18.75 | NP613266.1    |
|                    |                       | Sclerotinia sclerotiorum hypovirus 2        | SsHV2/SX247        | 8.00                      | -     | -     | 20.21 | 18.40 | AIA61616.1    |
|                    |                       | Sclerotinia sclerotiorum hypovirus 2        | SsHV2/5472         | 7.54                      | -     | -     | 20.21 | 13.43 | AHA56680.1    |
|                    |                       | Fusarium graminearum hypovirus 1            | FgHV1/HN10         | 7.91                      | -     | -     | 27.06 | 23.16 | AGC75065.1    |
|                    |                       | Fusarium graminearum hypovirus 2            | FgHV2/JS16         | 7.27                      | -     | -     | 11.20 | 19.90 | AKB94065.1    |
| <i>Potyviridae</i> | <i>Potyvirus</i>      | Plum pox virus                              | PPV                | 7.88                      | -     | -     | 13.56 | 14.05 | NP-040807     |

**Table S3.** The presence of *Trichoderma harzianum* hypovirus 1 (ThHV1) and ThHV1-S in the population of *Trichoderma* spp. in China.

| Isolate | Source                | Location           | Species                           | ThHV1+ <sup>1</sup> | ThHV1-S+ |
|---------|-----------------------|--------------------|-----------------------------------|---------------------|----------|
| T-9     | Soil                  | Enshi, Hubei       | <i>Trichoderma hamatum</i>        | -                   | -        |
| T-13    | Soil                  | Enshi, Hubei       | <i>Trichoderma atroviride</i>     | -                   | -        |
| T-18    | Soil                  | Enshi, Hubei       | <i>Trichoderma hamatum</i>        | -                   | -        |
| T-19    | Soil                  | Enshi, Hubei       | <i>Trichoderma hamatum</i>        | -                   | -        |
| T-21    | Soil                  | Wuhan, Hubei       | <i>Trichoderma harzianum</i>      | -                   | -        |
| T-26    | Soil                  | Wuhan, Hubei       | <i>Trichoderma atroviride</i>     | -                   | -        |
| T-31    | Soil                  | Wuhan, Hubei       | <i>Trichoderma album</i>          | -                   | -        |
| T-32    | Soil                  | Wuhan, Hubei       | <i>Trichoderma album</i>          | -                   | -        |
| T-33    | Soil                  | Wuhan, Hubei       | <i>Trichoderma koningiopsis</i>   | -                   | -        |
| T-34    | Soil                  | Wuhan, Hubei       | <i>Trichoderma koningiopsis</i>   | -                   | -        |
| T-35    | Soil                  | Wuhan, Hubei       | <i>Trichoderma koningiopsis</i>   | +                   | -        |
| T-37    | Soil                  | Wuhan, Hubei       | <i>Trichoderma koningiopsis</i>   | +                   | -        |
| T-38    | Soil                  | Wuhan, Hubei       | <i>Trichoderma atroviride</i>     | +                   | -        |
| T-41    | Soil                  | Wuhan, Hubei       | <i>Trichoderma harzianum</i>      | +                   | -        |
| T-49    | Soil                  | Wuhan, Hubei       | <i>Trichoderma koningiopsis</i>   | -                   | -        |
| T-50    | Soil                  | Wuhan, Hubei       | <i>Trichoderma polysporum</i>     | -                   | -        |
| T-52    | Soil                  | Wuhan, Hubei       | <i>Trichoderma polysporum</i>     | -                   | -        |
| T-57    | Soil                  | Hanchuan, Hubei    | <i>Trichoderma koningiopsis</i>   | -                   | -        |
| T-69    | Soil                  | Ezhou, Hubei       | <i>Trichoderma brevicompactum</i> | -                   | -        |
| JST-1   | soil                  | Nanjing, Jiangsu   | <i>Trichoderma</i> sp.            | -                   | -        |
| JST-2   | soil                  | Nanjing, Jiangsu   | <i>Trichoderma</i> sp.            | -                   | -        |
| JST-3   | soil                  | Nanjing, Jiangsu   | <i>Trichoderma</i> sp.            | -                   | -        |
| JST-4   | soil                  | Nanjing, Jiangsu   | <i>Trichoderma</i> sp.            | -                   | -        |
| JST-10  | soil                  | Hangzhou, Zhejiang | <i>Trichoderma</i> sp.            | -                   | -        |
| JST-11  | soil                  | Hangzhou, Zhejiang | <i>Trichoderma</i> sp.            | -                   | -        |
| JST-12  | soil                  | Hangzhou, Zhejiang | <i>Trichoderma</i> sp.            | +                   | -        |
| JST-14  | soil                  | Hangzhou, Zhejiang | <i>Trichoderma</i> sp.            | -                   | -        |
| YN8-2   | Straw of oilseed rape | Xinyang, Henan     | <i>Trichoderma</i> sp.            | +                   | -        |
| YN8-4   | Straw of oilseed rape | Xinyang, Henan     | <i>Trichoderma</i> sp.            | -                   | -        |
| YN8-49  | Straw of oilseed rape | Xinyang, Henan     | <i>Trichoderma</i> sp.            | -                   | -        |
| 3-1-221 | Straw of oilseed rape | Zhangzhou, Fujian  | <i>Trichoderma</i> sp.            | -                   | -        |

---

|        |                       |                  |                        |   |   |
|--------|-----------------------|------------------|------------------------|---|---|
| JN8M-2 | Straw of oilseed rape | Jinxian, Jiangxi | <i>Trichoderma</i> sp. | - | - |
| JN8M-4 | Straw of oilseed rape | Jinxian, Jiangxi | <i>Trichoderma</i> sp. | - | - |
| JN8M-8 | Straw of oilseed rape | Jinxian, Jiangxi | <i>Trichoderma</i> sp. | - | - |
| JN8M-9 | Straw of oilseed rape | Jinxian, Jiangxi | <i>Trichoderma</i> sp. | - | - |
| EN8-72 | Straw of oilseed rape | Hubei            | <i>Trichoderma</i> sp. | - | - |

---

1 "+" represents the presence of ThHV1 or ThHV1-S through the detection of RT-PCR with primer pairs listed in Table S1.

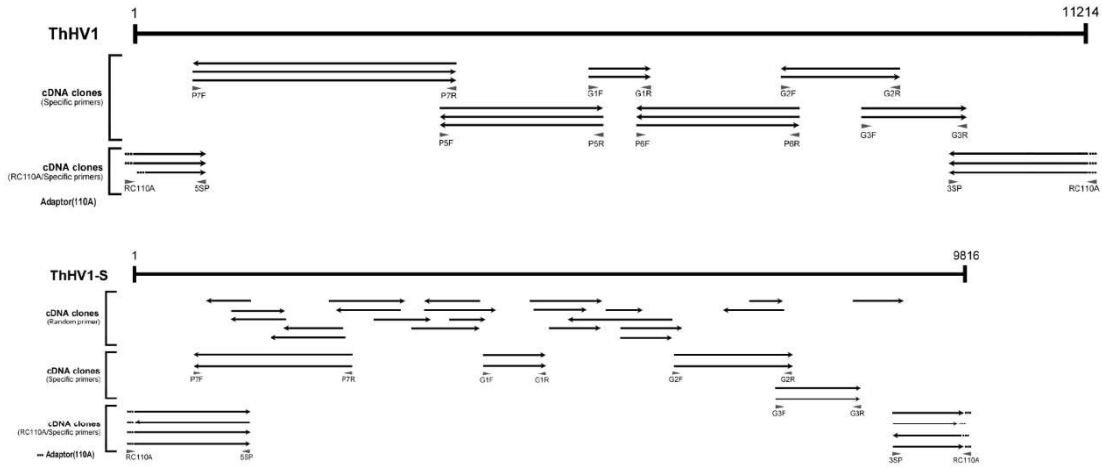

**Figure S1.** A schematic diagram showing the strategy used for full-length cDNA cloning of *Trichoderma harzianum* hypovirus 1 (ThHV1) and ThHV1-S. The location of PCR primers and the 5' and 3'-adaptor used in the cDNA cloning are indicated.

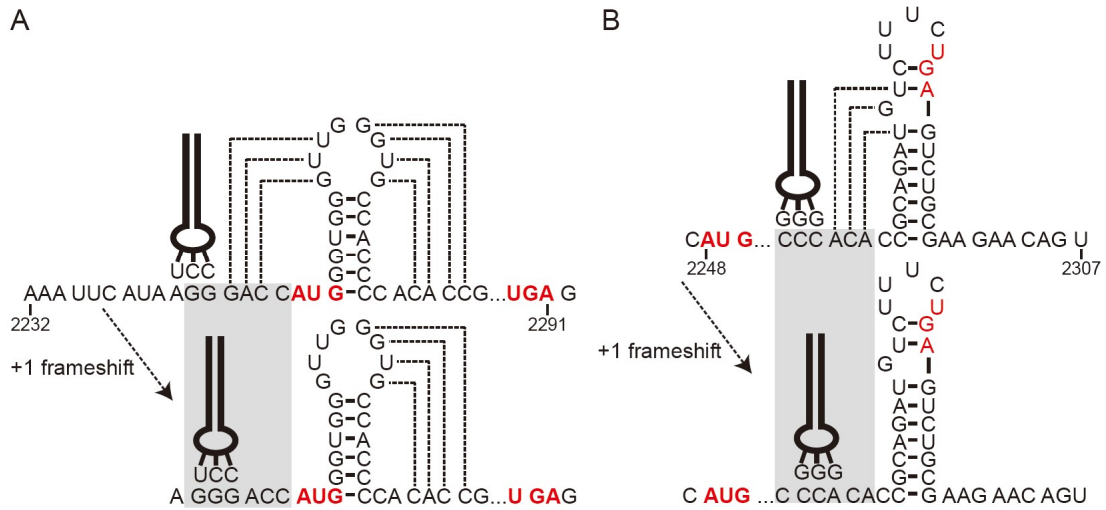

**Figure S2.** Two possible H-type pseudoknots upstream the overlap region of *Trichoderma harzianum* hypovirus 1 (ThHV1), and possibly responsible for the +1 frameshift of ThHV1 during the expression of ORF 2 encoded polypeptide. (A) A predicted RNA pseudoknot structure is located preceding the start site of ORF2. (B) Another predicted RNA pseudoknot structure is located preceding the stop site of ORF1. Dashed lines indicate base pairs predicted to form the stems in the pseudoknots.

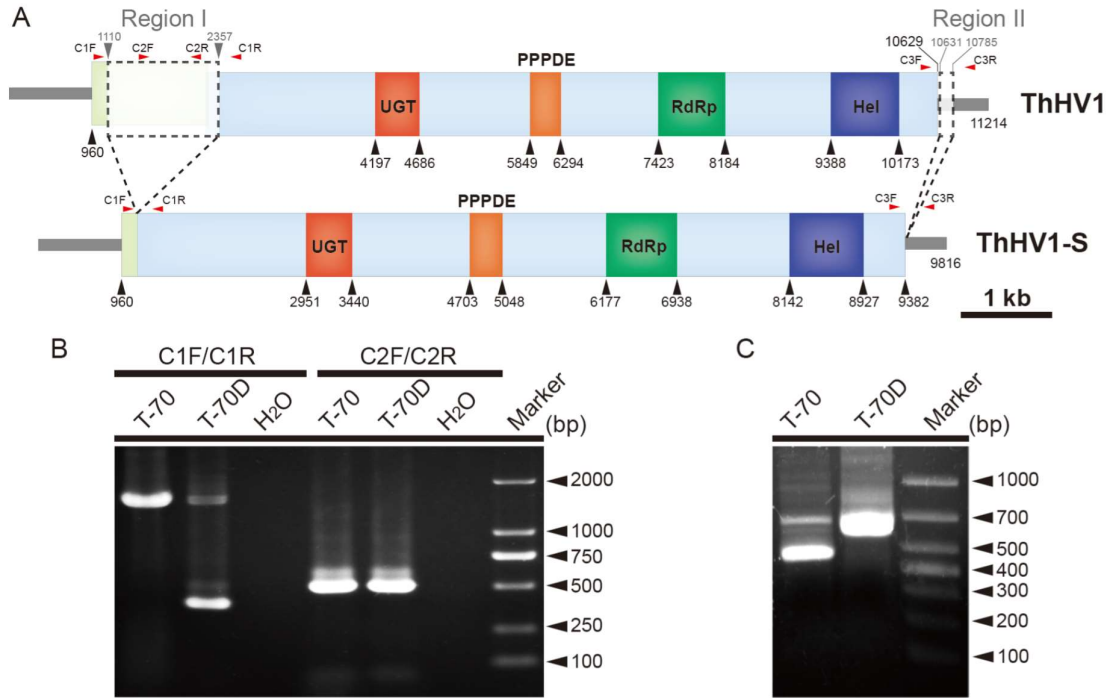

**Figure S3.** Conformation of the deleted region (I and II) of *Trichoderma harzianum* hypovirus 1 (ThHV1)-S in comparison with ThHV1 using RT-PCR. **(A)** Schematic diagram showing the deleted regions of ThHV1-S compared with ThHV1. Two dashed line frames indicate the two deleted regions on the genome of ThHV1, and the positions of primers used for RT-PCR detection are indicated as red arrowheads. **(B)** The RT-PCR detection of deleted region I on the genomes of both ThHV1 and ThHV1-S with primer pairs of C1F/C1R and C2F/C2R. **(C)** The RT-PCR detection of deleted region II on the genomes of both ThHV1 and ThHV1-S with primer pair of C3F/C3R.

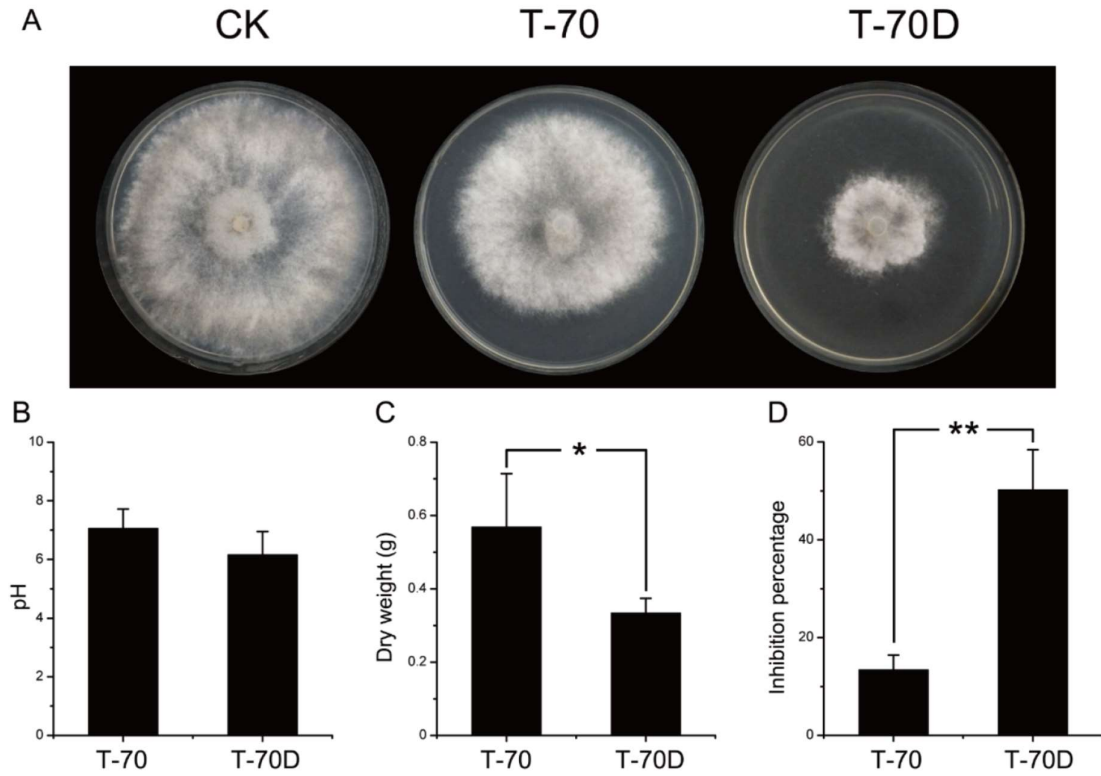

**Figure S4.** The antifungal ability assay of isolates T-70 and T-70D. (A) Mycelial growth of *Botrytis cinerea* on the PDA plate amended with 10% (*v/v*) cultural filtrate of isolate T-70, T-70D, or water (CK). (B) The pH value of the cultural filtrate for each isolate. (C) Mycelial dry weight of T-70 and T-70D after cultured in potato dextrose broth shake-incubated at 150 rpm on 25 °C for 7 days. (D) Inhibition percentage of *B. cinerea* growth rate on the PDA plate amended with 10% (*v/v*) cultural filtrate of T-70 or T-70D. “\*” and “\*\*” indicate significant difference according to the Student t test at  $p < 0.05$  and  $p < 0.01$  ( $n = 9$ ), respectively.

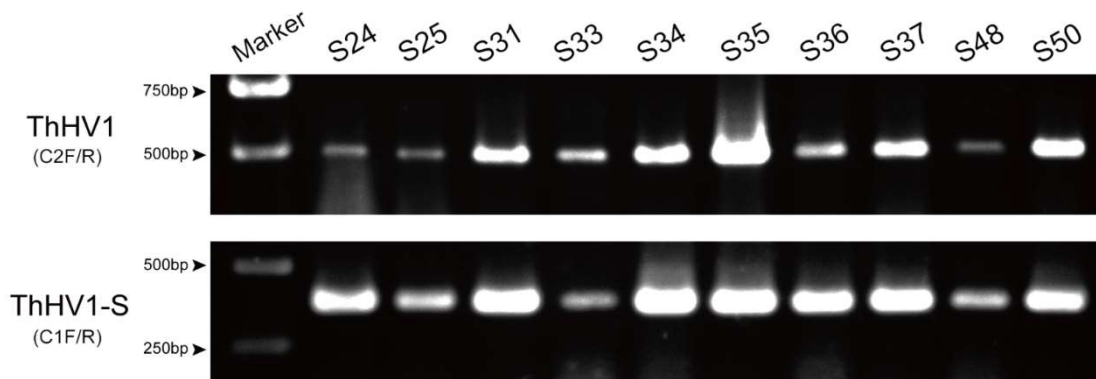

**Figure S5.** RT-PCR detection of presence of *Trichoderma harzianum* hypovirus 1 (ThHV1) and ThHV1-S in ten randomly selected single-conidium progeny isolates of T-70D with primer pairs C1F/C1R and C2F/C2R.

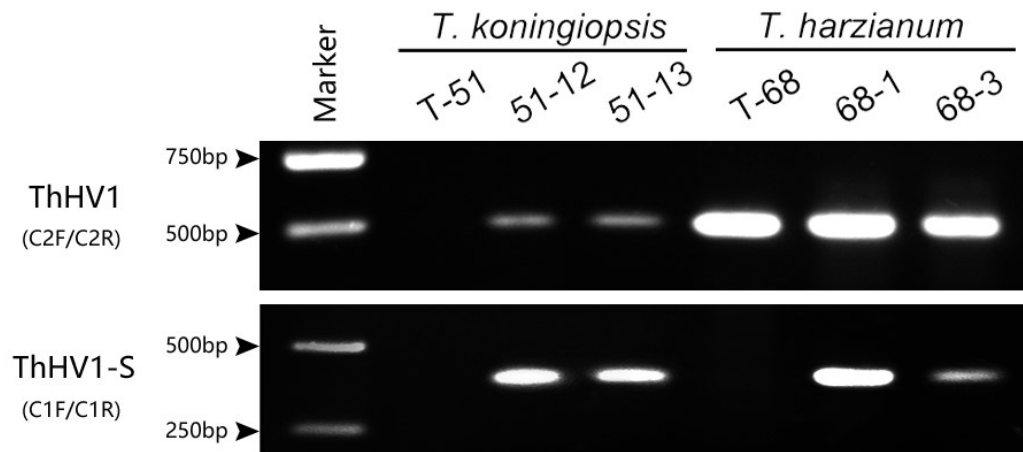

**Figure S6.** Detection of *Trichoderma harzianum* hypovirus 1 (ThHV1) and ThHV1-S in *Trichoderma* isolates T-68 and T-51 as well as their derivative strains using RT-PCR.

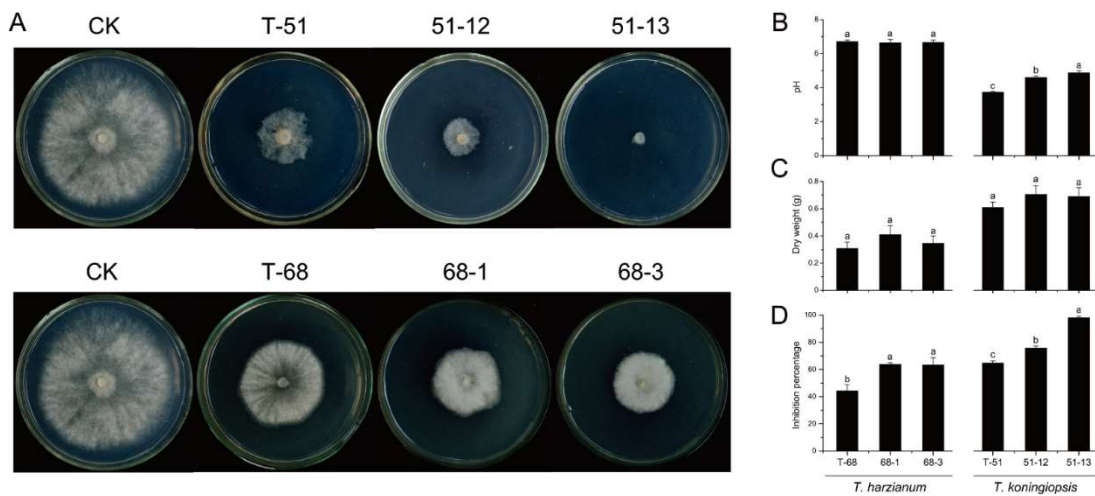

**Figure S7.** The antifungal ability assay of *Trichoderma* isolates T-68 and T-51 as well as their derivative strains. **(A)** Mycelial growth of *B. cinerea* on the PDA plate amended with 10% (*v/v*) cultural filtrate of each isolate/strain or water (CK). **(B)** The pH value of the cultural filtrate for each isolate/strain. **(C)** Mycelial dry weight of each isolate/strain after cultured in potato dextrose broth shake-incubated at 150 rpm on 25 °C for 7 days. **(D)** Inhibition percentage of *B. cinerea* growth rate on the PDA plate amended with 10% (*v/v*) cultural filtrate of each isolate/strain. Bars in graph **A**, **B** and **C** labeled with the same letters are not significantly different ( $p > 0.05$ ) according to Least Significant Difference Test ( $n = 9$ ).



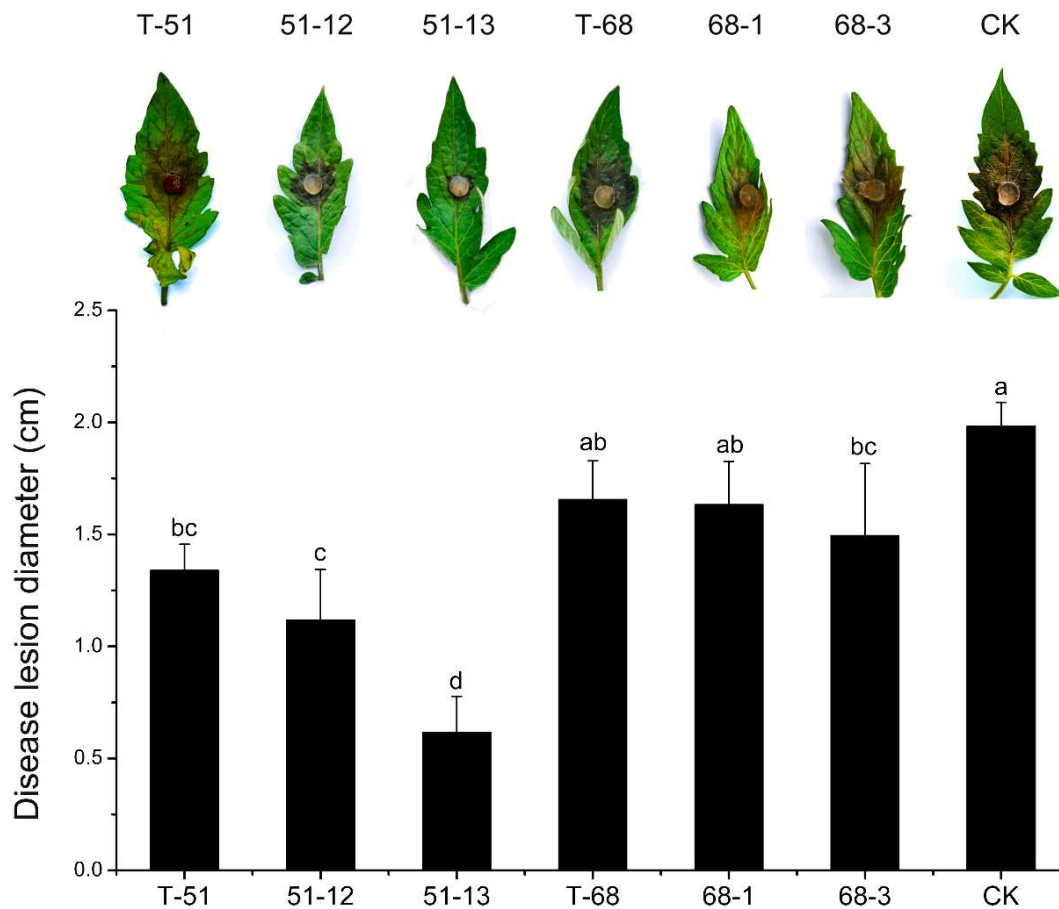

**Figure S8.** Antifungal ability of cultural filtrate of different *Trichoderma* isolates on tomato leaves against the infection of *B. cinerea*. Bars labeled with the same letters are not significantly different ( $p < 0.05$ ) according to Least Significant Difference Test ( $n = 9$ ).

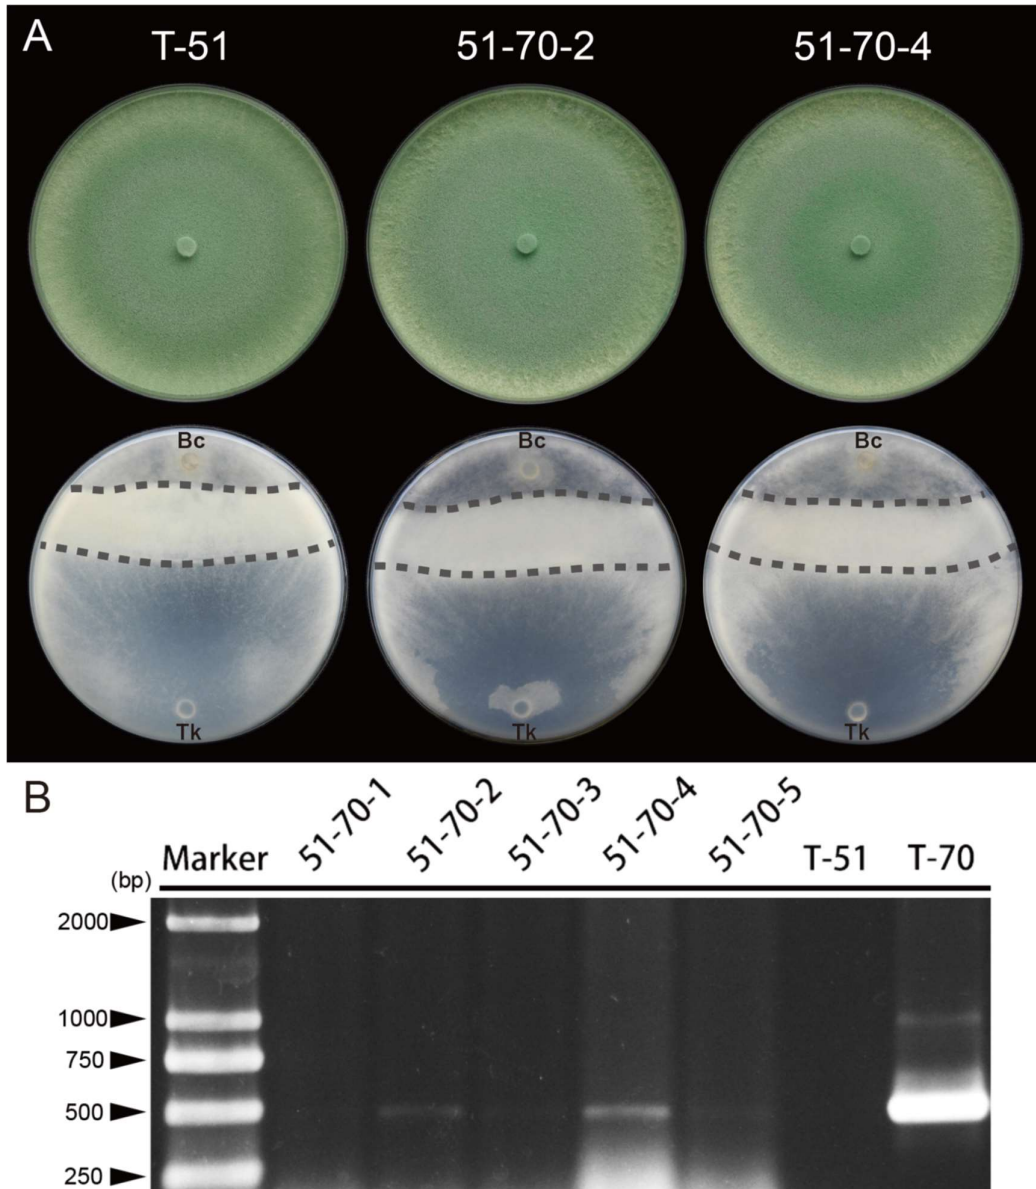

**Figure S9.** (A) Colony morphology and mycoparasitism ability of *Trichoderma koningiopsis* isolate T-51 and two derivative strains, 51-70-2 and 51-70-4, carrying *Trichoderma harzianum* hypovirus 1 (ThHV1) alone. The dashed lines indicate the regions of *B. cinerea* colonies colonized by *T. koningiopsis* in the three dual cultures. (B) RT-PCR detection the present of ThHV1 with primer pair C2F/C2R in isolates T-51 and T-70, and their derivative strains. Note that the 500-bp DNA band, indicating the presence of ThHV1, was detected in isolate T-70 and two derivative strains 51-70-2 and 51-70-4.
